# Supplementary material
Source: PubMed Central journal article supplement (PMC5847108)
Supplement: jamaophthalmol-135-446-s001.pdf [file jamaophthalmol-135-446-s001.pdf]

## Supplementary Online Content

van Dijk EHC, Schellevis RL, van Bergen MGJM, et al. Association of a haplotype in the *NR3C2* gene, encoding the mineralocorticoid receptor, with chronic central serous chorioretinopathy. *JAMA Ophthalmol*. Published online March 23, 2017. doi:10.1001/jamaophthalmol.2017.0245

**eTable 1.** KASP Probe Sequences and PCR Programs

**eTable 2.** Associations for Genetic Variant rs2070951

This supplementary material has been provided by the authors to give readers additional information about their work.

**eTable 1.** KASP Probe Sequences and PCR Programs

| Gene         | SNP        | Primer FAM Allele                  | Primer HEX Allele                    | Common Primer                     | FAM Allele | HEX Allele | PCR conditions*        |
|--------------|------------|------------------------------------|--------------------------------------|-----------------------------------|------------|------------|------------------------|
| <i>NR3C1</i> | rs56149945 | ACCAATTCCCGTTGGTTCCGA<br>AAA       | CCAATTCCCGTTGGTTCCGAAAG              | AAGTCAAGTTGTCATCTCCAG<br>ATCCTT   | A          | G          | 68-61 °C<br>Touch Down |
| <i>NR3C1</i> | rs41423247 | AAAGTAGACAAGTTATGTCTG<br>CTGATG    | AAAGTAGACAAGTTATGTCTGCTGA<br>TC      | ATTTTGTTCACCATGTTG<br>ACACCAATT   | G          | C          | 61-55 °C<br>Touch Down |
| <i>NR3C1</i> | rs6198     | TGTGTGGAAATGTTAACTTT<br>TATTTTTTCA | GTGTGGAAATGTTAACTTTTATTTT<br>TTCG    | GTGGTTTGGTAATACCAGAAC<br>AGCAAATT | A          | G          | 61-55 °C<br>Touch Down |
| <i>NR3C2</i> | rs2070951  | CTAATTTTTAATGTAAATTTA<br>TTTGTTAGG | CTCTAATTTTTAATGTAAATTTATT<br>TGTTAGC | ACTGTGGTAGCCTTTGGTCTC<br>CAT      | G          | C          | 61-55 °C<br>Touch Down |
| <i>NR3C2</i> | rs5522     | CATGACACATGATAGGGCTTT<br>TAACAAT   | ATGACACATGATAGGGCTTTTAAACA<br>AC     | GCTCCGTGAATGGTGGCGTC<br>AT        | A          | G          | 61-55 °C<br>Touch Down |

\*PCR programs available at <http://www.lgcgroup.com/LGCGroup/media/PDFs/Products/Genotyping/KASP-thermal-cycling-conditions-all-protocols.pdf>

**eTable 2.** Associations for Genetic Variant rs2070951

| Variant   | Minor Allele Frequency |               | Genotype <i>P</i> Value | Allelic <i>P</i> Value | OR (95% CI)         |
|-----------|------------------------|---------------|-------------------------|------------------------|---------------------|
|           | Controls               | cCSC patients |                         |                        |                     |
| rs2070951 | 0.464                  | 0.527         | .008                    | .004                   | 1.285 (1.083-1.525) |
| Male      | 0.469                  | 0.531         | .053                    | .020                   | 1.281 (1.040-1.578) |
| Female    | 0.461                  | 0.508         | .458                    | .309                   | 1.209 (0.838-1.745) |

Abbreviations: CI, confidence interval; OR, odds ratio
